1 ***Fusobacterium nucleatum* metabolically integrates commensals and**  
2 **pathogens in oral biofilms**

3

4 Akito Sakanaka<sup>a</sup>, Masae Kuboniwa<sup>a\*</sup>, Shuichi Shimma<sup>b</sup>, Samar A. Alghamdi<sup>a</sup>, Shota Mayumi<sup>a</sup>,  
5 Richard J. Lamont<sup>c</sup>, Eiichiro Fukusaki<sup>b</sup>, Atsuo Amano<sup>a</sup>

6 <sup>a</sup>Department of Preventive Dentistry, Graduate School of Dentistry, Osaka University, 565-0871  
7 Osaka, Japan

8 <sup>b</sup>Department of Biotechnology, Graduate School of Engineering, Osaka University, 565-0871  
9 Osaka, Japan

10 <sup>c</sup>Department of Oral Immunology and Infectious Diseases, School of Dentistry, University of  
11 Louisville, Louisville, KY 40202

12 \*Corresponding author:

13 Masae Kuboniwa, DDS, PhD

14 Associate Professor

15 Department of Preventive Dentistry

16 Osaka University Graduate School of Dentistry

17 1-8 Yamadaoka, Suita, Osaka 565-0871, Japan

18 TEL: +81-6-6879-2922

19 **Email:** [kuboniwa@dent.osaka-u.ac.jp](mailto:kuboniwa@dent.osaka-u.ac.jp)

20 ORCID ID: Akito Sakanaka (0000-0001-9733-6886), Masae Kuboniwa (0000-0002-3332-2431),  
21 Shuichi Shimma (0000-0002-4699-6590), Samar A. Alghamdi (0000-0001-9829-944X), Shota  
22 Mayumi (0000-0002-2391-4230), Richard J. Lamont (0000-0002-3147-5039), Eiichiro Fukusaki  
23 (0000-0003-3069-5547), Atsuo Amano (0000-0002-5158-147X)

24 **Classification**

25 Major classification: Biological Sciences

26 Minor classification: Microbiology

27 **Keywords**

28 periodontitis, polymicrobial, cross-feeding, biofilm, *Fusobacterium nucleatum*

29

## 30 **Abstract**

31 *Fusobacterium nucleatum* is a common constituent of the oral microbiota in both periodontal  
32 health and disease. Previously, we discovered ornithine cross-feeding between *F. nucleatum* and  
33 *Streptococcus gordonii*, where *S. gordonii* secretes ornithine via an arginine-ornithine antiporter  
34 (ArcD), which in turn supports the growth and biofilm development of *F. nucleatum*; however,  
35 broader metabolic aspects of *F. nucleatum* within polymicrobial communities and their impact on  
36 periodontal pathogenesis have not been addressed. Here, we show that when co-cultured with *S.*  
37 *gordonii*, *F. nucleatum* increased amino acid availability to enhance the production of butyrate  
38 and putrescine, a polyamine produced by ornithine decarboxylation. Co-culture with *Veillonella*  
39 *parvula*, another common inhabitant of the oral microbiota, also increased lysine availability,  
40 promoting cadaverine production by *F. nucleatum*. We confirmed that ArcD-dependent ornithine  
41 excretion by *S. gordonii* results in synergistic putrescine production, and mass spectrometry  
42 imaging revealed this metabolic capability creates a putrescine-rich microenvironment inside *F.*  
43 *nucleatum* biofilms. We further demonstrated that polyamines caused significant changes in the  
44 biofilm phenotype of a periodontal pathogen, *Porphyromonas gingivalis*, with putrescine being a  
45 potent stimulator of biofilm development and dispersal, and confirmed that *F. nucleatum*-  
46 mediated conversion of ornithine to putrescine enhances biofilm formation by *P. gingivalis*. Lastly,  
47 analysis of plaque samples revealed cooccurrence of *P. gingivalis* with genetic modules for  
48 putrescine production by *S. gordonii* and *F. nucleatum*. Overall, our results highlight the ability of  
49 *F. nucleatum* to induce synergistic polyamine production within multi-species consortia, and  
50 provide insight into how the trophic web in oral biofilm ecosystems can eventually shape disease-  
51 associated communities.

## 52 **Significance Statement**

53 Periodontitis is caused by the pathogenic transition of subgingival microbiota ecosystems, which  
54 is accompanied by alterations to microbiome functions including metabolic systems and the  
55 establishment of metabolic cross-feeding. While *Fusobacterium nucleatum* is a major constituent  
56 of the periodontal microbiota, its metabolic integration within polymicrobial communities and the  
57 impact on periodontal pathogenesis are poorly understood. Here, we report that amino acids  
58 supplied by other commensal bacteria induce polyamine production by *F. nucleatum*, creating  
59 polyamine-rich microenvironments. We further show that this trophic web results in enhancement  
60 of biofilm formation and dispersal of a periodontal pathogen, *Porphyromonas gingivalis*. This work

61 provides mechanistic insight into how cooperative metabolism within oral biofilms can tip the  
62 balance toward periodontitis.

63

64

## 65 **Main Text**

66

## 67 **Introduction**

68

69 Periodontitis is a multifactorial chronic disease with diverse phenotypes often characterized by  
70 inflammatory destruction of periodontal tissues (1). The risk and severity of periodontitis are  
71 attributed to a dysbiotic transition in the community of microbes residing in the subgingival biofilm  
72 (2). In this process, *Porphyromonas gingivalis* plays a central role, although recent studies  
73 suggest that colonization of *P. gingivalis* does not necessarily elicit disease, and that full virulence  
74 requires the presence of the commensal microbiota, highlighting the importance of polymicrobial  
75 synergy in the disease etiology (3). Notably, a recent metatranscriptomic analysis of subgingival  
76 plaque from periodontitis patients showed highly conserved metabolic profiles, even though  
77 substantial microbiome variation was observed (4). This finding suggests that the transition  
78 between periodontal health and disease is more correlated with a shift in metabolic function of the  
79 community as a whole, rather than with the presence of individual taxa, drawing attention to  
80 metabolic aspects of microbial communities in periodontal pathogenesis.

81 Metabolic cross-feeding is one of the key factors directing the establishment of a community  
82 and the metabolism therein (5). A subset of oral streptococci engages in cross-feeding  
83 interactions with other community members that often result in elevated pathogenicity of microbial  
84 communities (6). A well-known example is lactate cross-feeding from *Streptococcus gordonii* to  
85 lactate-utilizing bacteria, such as *Veillonella parvula* and *Aggregatibacter*  
86 *actinomycetemcomitans*, where *S. gordonii* releases lactate as an end-product of glucose  
87 metabolism, thus allowing complementary utilization of available glucose and promoting fitness of  
88 these organisms in the community (7, 8). *S. gordonii* also impacts the pathogenicity of *P.*  
89 *gingivalis* through the secretion of para-aminobenzoic acid, which promotes in vivo fitness and  
90 colonization of *P. gingivalis*, albeit with diminished virulence (9). Given recent bioinformatic  
91 research showing that the oral microbiome can produce an enormous number of small  
92 metabolites that may influence oral pathophysiology (10), many more metabolic interactions  
93 between oral microbes likely remain to be discovered.

94 *F. nucleatum* is a common constituent of the oral microbiota, and has been implicated in both  
95 periodontal health and disease due to its frequent detection in subgingival plaque samples of both  
96 healthy and diseased sites (11-13). While this species is well known for its organizing role in oral  
97 biofilms through the expression of multiple adhesins, whereby it can direct the spatial

98 relationships among early and later colonizers (14), metabolic aspects of interspecies interactions  
99 between *F. nucleatum* and other community members remain relatively unknown. Earlier studies  
100 showed that *F. nucleatum* supports the growth of *P. gingivalis* by rendering the microenvironment  
101 alkaline and less-oxidative (15). *F. nucleatum* has a preference for peptides and amino acids, and  
102 produces butyrate and ammonia as end-products of the fermentation pathways, starting mainly  
103 from glutamate and lysine (16, 17). The aforementioned metatranscriptomic analyses showed  
104 that despite nearly the same abundance of *F. nucleatum* between healthy and periodontitis  
105 samples, its metabolism is markedly changed under those two conditions (4). Considering that *F.*  
106 *nucleatum* is also strongly linked to serious systemic conditions such as adverse pregnancy  
107 outcomes and colorectal cancer (13), it is important to improve our basic understanding of the  
108 metabolic properties of *F. nucleatum* within polymicrobial communities.

109 Recently, we identified a novel metabolic interaction between *S. gordonii* and *F. nucleatum*  
110 (18), starting from the metabolism of arginine by *S. gordonii* as a substrate in the arginine  
111 deiminase system (ADS), through which arginine is converted to ornithine with concomitant  
112 production of ammonia and ATP. An arginine-ornithine antiporter of *S. gordonii*, ArcD, then  
113 excretes ornithine as a metabolic by-product of the ADS, which in turn enhances the growth and  
114 biofilm development of *F. nucleatum*. However, it is unknown how ornithine influences *F.*  
115 *nucleatum* metabolism and what consequences this interaction has for disease etiology.  
116 Therefore, in this study, we set out to further dissect the metabolic interactions mediated by *F.*  
117 *nucleatum* within multi-species consortia, and determine whether the engagement of *F.*  
118 *nucleatum* in metabolic interactions in oral biofilms can impact the potential pathogenicity of the  
119 microbial community. By using a synthetic community model to assess the metabolic changes of  
120 *F. nucleatum* and its microenvironment when co-cultured with *S. gordonii* and/or *V. parvula*, we  
121 show that the presence of partner species alters the amino acid metabolism in *F. nucleatum*,  
122 inducing production of butyrate and polyamines. We also demonstrate that putrescine production  
123 by *F. nucleatum* depends on ornithine cross-feeding via ArcD of *S. gordonii*. We further show that  
124 polyamines can modulate the biofilm phenotypes of *P. gingivalis*, with putrescine being a potent  
125 stimulator of biofilm formation and dispersal. This study has thus uncovered an emerging role of  
126 *F. nucleatum* as a metabolic bridge to relay the metabolic flow between initial and late colonizers,  
127 thereby creating favorable conditions for the outgrowth and spread of *P. gingivalis*.

128

129

## 130 **Results**

131

### 132 **Distinct metabolic profiles in *F. nucleatum* co-cultured with *S. gordonii* and/or *V. parvula*.**

133 We performed untargeted analysis of the intra- and extracellular metabolite changes in *F.*  
134 *nucleatum* when co-cultured with *S. gordonii* and/or *V. parvula*. To facilitate metabolite exchange

135 between different species and focus upon metabolic aspects of interspecies interactions, we used  
136 Transwell assays, which physically separate bacterial populations but allows for metabolite  
137 exchange via a shared medium reservoir. The system was anaerobically incubated in triplicate for  
138 6 h in chemically defined medium (CDM) without organic nitrogen sources. Overall, we identified  
139 111 extracellular and 85 intracellular metabolites, 52 of which were shared intra- and extracellularly  
140 (Dataset S1 and S2).

141 In co-culture with *S. gordonii*, orthogonal projection to latent structures-discriminant analysis  
142 (OPLS-DA) revealed that the intracellular metabolic profile of *F. nucleatum* clustered distinctly from  
143 that of *F. nucleatum* alone (Fig. 1A, inset), with putrescine, a product of ornithine decarboxylation,  
144 and *N*-acetylornithine, a product of ornithine acetylation, being associated with, and increased by,  
145 the presence of *S. gordonii* (Fig. 1A). Furthermore, we noted that the presence of *S. gordonii*  
146 elevated the intracellular concentrations of amino acids (alanine and glutamate) and a dipeptide  
147 (alanylalanine). Additionally, 16 extracellular metabolites were found in increased concentration  
148 using a fold change cutoff of 2 and a *p*-value of 0.05 (Fig. 1B). These metabolites were dominated  
149 by amino acids (ornithine, alanine, etc.) and products of amino acid fermentation and  
150 decarboxylation (butyrate, *N*-acetylputrescine, etc.). In particular, the relative concentrations of  
151 ornithine, alanine and butyrate were markedly increased in co-culture supernatants by 24.7-, 15.5-,  
152 and 9.4-fold, respectively. Further tests of *S. gordonii* mono-cultures confirmed that *S. gordonii*  
153 released all amino acids described here, some of which surpassed the levels during co-culture  
154 (e.g., ornithine, alanine, alanylalanine), suggesting net uptake of these metabolites by *F. nucleatum*  
155 (Fig. 1C). In contrast, fermented and decarboxylated products were undetected in the supernatant  
156 of *S. gordonii* alone, reflecting the metabolic potential of *F. nucleatum* to enhance production of  
157 these compounds in the presence of *S. gordonii*.

158 In co-culture with *V. parvula*, OPLS-DA showed a discrete intracellular metabolite profile of *F.*  
159 *nucleatum*, in which lysine, dihydroxyacetone phosphate and thiamine were increased (Fig. 2A).  
160 Additionally, we found increased levels of seven extracellular metabolites in co-culture, four of  
161 which were products of amino acid fermentation and decarboxylation. In particular, cadaverine, a  
162 product of lysine decarboxylation, exhibited the most prominent change (Fig. 2B). Since cadaverine  
163 was undetected in the supernatants of *V. parvula* mono-cultures (Fig. 2C), *F. nucleatum* is likely to  
164 produce cadaverine by utilizing lysine released by *V. parvula*. In co-culture with a mixed population  
165 of *S. gordonii* and *V. parvula*, we observed an additive effect of these two species on the intra- and  
166 extracellular metabolic profiles of *F. nucleatum* (Fig. S1).

167

168 **Upregulation of butyrate fermentation and polyamine production by *F. nucleatum* in co-**  
169 **culture.** To gain further insight into these metabolic interactions, we assessed transcriptional  
170 changes in related genes of *F. nucleatum* using real-time RT-PCR under the same culture  
171 conditions as those of the metabolomics assays. In co-culture with *S. gordonii*, we observed an

172 upregulation of a cluster of genes encoding critical enzymes for butyrate production, including  
173 FN0202-0204, which is located in the 2-hydroxyglutarate pathway and links butyrate to glutamate  
174 (Fig. 3A). The same trend was observed when *F. nucleatum* was co-cultured with mixtures of *S.*  
175 *gordonii* and *V. parvula*, while the presence of *V. parvula* had a minor effect on the transcriptional  
176 activation of butyrate fermentation pathways, with only two enzymes of the butyrate production from  
177 lysine pathway upregulated. Since amino acid fermentation contributes to energy generation in  
178 anaerobic bacteria, we measured the ATP levels in *F. nucleatum* cells in co-culture. We found a  
179 1.87-fold increase in ATP levels per cell in *F. nucleatum* co-cultured with *S. gordonii* (Fig. 3B).  
180 Collectively, these data indicate that coexistence with *S. gordonii* facilitates butyrate production,  
181 especially from glutamate, by *F. nucleatum*, thereby promoting ATP generation.

182 Putrescine and cadaverine are most commonly produced by the decarboxylation of ornithine  
183 and lysine, reactions catalyzed by ornithine decarboxylase (encoded by *speC*; Enzyme  
184 Commission number, E.C. 4.1.1.17) and lysine decarboxylase (*cadA*; E.C. 4.1.1.18), respectively.  
185 A newly reannotated database of *Fusobacterium* genomes shows the presence of a gene  
186 containing the domain of ornithine and lysine decarboxylases in *F. nucleatum* ATCC25586  
187 (FN0501), which shows high similarity to the sequences of both the *speC* and *cadA* genes of  
188 *Escherichia coli* (19, 20). We found that the relative transcriptional level of FN0501 was elevated  
189 greater than 20-fold in all pairs of co-cultures in our assays (Fig. 3A). Furthermore, *F. nucleatum*  
190 possesses a gene (FN0504) which shows high similarity to the putrescine/ornithine antiporter of *E.*  
191 *coli* (21), and this gene was also transcribed at a significantly increased level in the presence of *S.*  
192 *gordonii* and/or *V. parvula*.

193 Collectively, these results suggest that the presence of *S. gordonii* and *V. parvula* increases  
194 amino acid availability for *F. nucleatum*, resulting in enhanced production of fermented and  
195 decarboxylated metabolites. Notably, *F. nucleatum* is likely to produce putrescine and cadaverine  
196 via decarboxylation of ornithine and lysine released by *S. gordonii* and *V. parvula*, respectively.

197

198 **Commensal-triggered polyamine production by *F. nucleatum*.** We next tested whether  
199 putrescine production results from ArcD-dependent excretion of ornithine by *S. gordonii*. We  
200 incubated mixtures of *F. nucleatum* with WT or *S. gordonii*  $\Delta$ *arcD* as well as mono-cultures of each  
201 strain in CDM containing 10 mM arginine, and quantified concentrations of arginine, ornithine and  
202 putrescine in the culture supernatants. After 24 h, WT *S. gordonii* consumed arginine completely  
203 and released 8.26 mM ornithine, but was unable to produce putrescine by itself (Fig. 4A). Similarly,  
204 *F. nucleatum* alone failed to utilize arginine or to produce putrescine and ornithine. In contrast, co-  
205 cultures of *F. nucleatum* and WT *S. gordonii* depleted arginine and released 3.55 mM ornithine and  
206 2.94 mM putrescine, which together with ammonia produced via ADS, allowed for maintenance of  
207 neutral pH in culture supernatants (Fig. 4A, far right). Lack of ArcD suppressed not only arginine  
208 uptake and ornithine release by *S. gordonii*, as demonstrated in our previous work (18), but also

209 putrescine production in co-cultures. Next, we used spent medium from mono-cultures of each  
210 organism to culture the other, and quantified arginine, ornithine and putrescine in the culture  
211 supernatants. *S. gordonii* depleted 10 mM arginine and released 7.27 mM ornithine during 12 h-  
212 cultivation (Fig. 4B). When *F. nucleatum* was cultured using these supernatants, ornithine  
213 decreased from 7.27 to 4.93 mM, while putrescine increased from 0 to 2.43 mM. In contrast,  
214 arginine remained intact when *F. nucleatum* was initially cultured, and cultivation of *S. gordonii*  
215 using these supernatants failed to produce putrescine. Collectively, these results indicate that  
216 production of putrescine by *F. nucleatum* depends on release of ornithine from *S. gordonii* as a  
217 metabolic by-product of the ADS.

218 We then incubated axenic cultures of *F. nucleatum* in the presence of 10 mM lysine or mixed  
219 cultures with *V. parvula* or WT *S. gordonii* in CDM and quantified cadaverine in the culture  
220 supernatants. After 24 h, 0.44 mM cadaverine was produced in the lysine-incubated axenic  
221 cultures, while co-cultures with *V. parvula* produced 0.29 mM cadaverine, suggesting synergistic  
222 cadaverine production via lysine cross-feeding between these species (Fig. 4C).

223 To further validate the ability of *F. nucleatum* to metabolize ornithine to putrescine and to  
224 evaluate its consequence on biofilm microenvironments, we employed matrix-assisted laser  
225 desorption/ionization mass spectrometry imaging (MALDI-MSI) and quantitatively visualized the  
226 spatial distribution of putrescine within *F. nucleatum* biofilms formed on glass slides treated with or  
227 without 10 mM ornithine. Illustrations of ion signals for putrescine revealed an abundance of  
228 putrescine deposited within the biofilm treated with ornithine (Fig. 4E and F), providing evidence  
229 that *F. nucleatum* can alter the metabolic landscape in the biofilm by creating a putrescine-rich  
230 microenvironment.

231

232 **Polyamines can enhance the pathogenic potential of *P. gingivalis* via modulation of the**  
233 **biofilm phenotype.** The results presented above indicate that metabolic interactions among oral  
234 commensals can induce polyamine production by *F. nucleatum*. To explore the consequences of  
235 these interactions on the development of disease-associated communities, we assessed the effects  
236 of polyamines on the biofilm phenotype of a periodontal pathogen, *P. gingivalis*. For this  
237 experiment, we used the most widely distributed bioactive polyamines (putrescine, spermidine,  
238 spermine and cadaverine), whose release from *F. nucleatum* was also confirmed in the Transwell  
239 assays (Dataset S1). We incubated preformed-*P. gingivalis* biofilms anaerobically with each  
240 polyamine for 12 h. After staining with Live/Dead reagent and 3 h-additional incubation with each  
241 polyamine, the amount and viability of the biofilm and of planktonic cells were evaluated using  
242 confocal laser scanning microscope (CLSM). Analysis of the biofilm structures showed the  
243 stimulatory effects of putrescine, cadaverine ( $p < 0.01$ ) and spermidine ( $p < 0.05$ ) on biofilm  
244 development; in particular, exogenous putrescine caused the greatest increase in not only the  
245 viable attached biofilms but also the viable planktonic biomass, which had dispersed from the post-

246 stained biofilms (Fig. 5A and C). In contrast, cadaverine exhibited an opposite trend in this regard,  
247 producing more rigid biofilms with less suspended planktonic cells (Fig. 5B). These results  
248 suggested that these polyamines have discrete effects on the biofilm phenotype of *P. gingivalis*.  
249 Furthermore, we observed a dose-dependent effect of putrescine on the amounts of biofilms as  
250 well as dispersed cells of *P. gingivalis* (Fig. 5E), suggesting a potent stimulatory effect on both  
251 biofilm formation and dispersal. To test whether the observed effects of polyamines were specific  
252 to *P. gingivalis*, we performed additional controls using other bacteria. Unlike *P. gingivalis*, *S.*  
253 *gordonii* was relatively insensitive to polyamines, with its dispersal behavior repressed, and its  
254 biofilm formation was promoted only by spermidine (Fig. 5D). In contrast, spermine exhibited biofilm  
255 disruptive activity against *F. nucleatum*, and cadaverine increased both the biofilm and planktonic  
256 biomass of *V. parvula* (Fig. S2). These results indicate that polyamines have a diversity of  
257 physiological functions in different oral bacteria. Finally, we observed the response of *P. gingivalis*  
258 to pH-adjusted cell-free supernatants from co-cultures of *F. nucleatum* and WT/ *S. gordonii*  $\Delta$ *arcD*.  
259 We found that cell-free supernatants from co-cultures of *F. nucleatum* and WT *S. gordonii*  
260 significantly enhanced biofilm formation by *P. gingivalis* (Fig. 5F). Additionally, mixed biofilm  
261 experiments showed that metabolism of ornithine by *F. nucleatum* produces a synergistic effect on  
262 *P. gingivalis* biofilm growth (Fig. 5G and H) Together, these data showed that polyamines produced  
263 by *F. nucleatum* can impact the biofilm phenotypes of *P. gingivalis*, with putrescine being a potent  
264 stimulator of biofilm development and dispersal.

265

266 **Cooccurrence of *P. gingivalis* with genetic modules for putrescine production by *S. gordonii***  
267 **and *F. nucleatum* in plaque samples.** To test the applicability of the results to the human oral  
268 cavity, we analyzed plaque samples from 102 systemically healthy individuals and investigated the  
269 relationship between the presence of *P. gingivalis* and the levels of the *arcD* gene of *S. gordonii*,  
270 and FN0501 of *F. nucleatum* using real-time PCR. We found that *P. gingivalis* was detected more  
271 frequently as periodontal health deteriorates (Fig. 6A). Furthermore, the *arcD* gene of *S. gordonii*  
272 exhibited a higher abundance in *P. gingivalis* positive samples (Fig. 6B), and a combination of *arcD*  
273 and FN0501 genes by logistic regression achieved areas under the curve of 0.76 for *P. gingivalis*  
274 detection, surpassing the discriminative performance of periodontal inflamed surface area, a  
275 numerical representation of periodontitis severity (22) (Fig. 6C). These data provide clinical  
276 evidence suggesting cooccurrence of *P. gingivalis* with genetic modules for putrescine production  
277 by *S. gordonii* and *F. nucleatum*. Based on these results, we propose a model of metabolic  
278 interactions within oral biofilms whereby ADS in *S. gordonii* facilitates putrescine production by *F.*  
279 *nucleatum* which could further promote the biofilm overgrowth and dispersal of *P. gingivalis* (Fig.  
280 7A and B).

281

282



## 283 Discussion

284

285 Oral bacterial communities often exhibit synergistic pathogenesis via physical and metabolic  
286 interactions among community members, which perturbs host homeostasis and ultimately causes  
287 periodontitis (2). *F. nucleatum*, which is a major constituent of the periodontal microbiota,  
288 contributes to this process by connecting a diverse range of microbes and lending physical  
289 support to the biofilm structure (13). Here, we report that engagement of *F. nucleatum* in  
290 metabolic interactions with other commensal bacteria creates polyamine-rich microenvironments,  
291 which facilitate biofilm development and dispersal of *P. gingivalis*, thereby potentially impacting  
292 the pathogenicity of periodontitis.

293 Combining the results of intra- and extracellular metabolite changes in *F. nucleatum* from  
294 Transwell assays suggested possible engagement of some amino acids in cross-feeding  
295 interactions. Specifically, in addition to ornithine, consistent with our previous report (18), *F.*  
296 *nucleatum* acquired alanine, alanylalanine and glutamate released from *S. gordonii* and lysine  
297 from *V. parvula*, although it is unclear if these metabolites are released via leakage or specific  
298 transport. Amino acids are the main source of energy for *F. nucleatum*, but it does not possess a  
299 high level of endopeptidase activity (23), and previous studies propose that it takes advantage of  
300 amino acids and peptides available through interspecies interactions with proteolytic bacteria  
301 such as *P. gingivalis* (24, 25). Our results suggest that amino acids can also be supplied by oral  
302 commensals lacking proteolytic activity through a cross-feeding behavior. Indeed, emerging  
303 evidence suggests that amino acid cross-feeding is one of the main drivers of interspecies  
304 interactions in microbial communities (5, 26, 27). Recent experimental observations show that  
305 diverse microbial species secrete amino acids without fitness cost, which generates ample cross-  
306 feeding opportunities, and can be facilitated by anoxic conditions (28). In light of this, our results  
307 support the plausibility of widespread amino acid cross-feeding within both the supragingival and  
308 subgingival communities, which could underlie metabolic shifts during the transition from  
309 periodontal health to disease.

310 One of the most striking findings in this study was that *S. gordonii* and *F. nucleatum* interact  
311 cooperatively to produce putrescine from arginine through ornithine, and this trophic web results  
312 in alterations in *P. gingivalis* biofilm phenotypes. Conversion of ornithine to putrescine via  
313 decarboxylation consumes cytoplasmic protons and creates a proton motive force (29), offering  
314 an energetic advantage to *F. nucleatum*. Consumption of ornithine also helps maintain the ADS  
315 function and achieve a sustainable energy supply for *S. gordonii*. From ecological and  
316 evolutionary perspectives, therefore, this collaborative metabolism accomplished by the ADS of  
317 *S. gordonii* and ornithine decarboxylase of *F. nucleatum* would be favored by natural selection,  
318 since it allows for the efficient use of limited resources and confers fitness benefits to both  
319 species. Moreover, this sequential reaction eventually created an alkaline microenvironment via

320 ADS-dependent ammonia and *F. nucleatum*-derived putrescine (Fig. 4A). Given the biofilm-  
321 stimulating effect of putrescine, these chemical and metabolic changes favor the survival of *P.*  
322 *gingivalis*, suggesting that this mutualistic interaction between these three species underlies the  
323 enhancement of community pathogenicity.

324 In addition, *F. nucleatum* has been implicated in colorectal cancer (13), and a recent imaging-  
325 based analysis of colon tumors has revealed an abundance of acetylated polyamines in  
326 colorectal biofilm samples (30). Although further studies are needed, our findings suggest that the  
327 contribution of this species to colon tumorigenesis could be attributed, at least partially, to the  
328 polyamine production system.

329 It should be noted that significant extracellular accumulation of putrescine was observed in  
330 polyamine production assays (Fig. 4) while not in Transwell assays (Fig. 1B). Given that  
331 polyamines have diverse cellular functions and their intracellular levels are strictly regulated in  
332 bacteria (31), one possible explanation is that putrescine secretion by *F. nucleatum* is likely due  
333 to metabolic overflow, where a certain amount of ornithine in the medium triggers overproduction  
334 of putrescine, inducing its secretion (32). We consider that the extracellular level of ornithine had  
335 yet to reach this amount in Transwell assays, where *F. nucleatum* and *S. gordonii* were incubated  
336 without arginine for only 6 h. Additional studies are required to elucidate the underlying  
337 mechanisms regulating production and secretion of putrescine in this organism, and we are  
338 addressing this question by targeting several polyamine transporters of *F. nucleatum*, including a  
339 putative polyamine ABC transporter and FN504. In addition, polyamine homeostasis is known to  
340 be maintained by acetylation of its substrates and products (33), and we detected some  
341 acetylated metabolites in *F. nucleatum* (e.g. *N*-acetylornithine, *N*-acetylputrescine, Fig. 1A),  
342 whose roles in polyamine metabolism have also to be investigated.

343 Putrescine is regarded as one of the most common polyamines in bacteria, and together with  
344 spermidine, its biosynthesis was found to be essential for the growth of many opportunistic  
345 pathogens, including *Pseudomonas aeruginosa* and *Campylobacter jejuni* (34, 35). Putrescine  
346 and spermidine are also required for biofilm formation by *Bacillus subtilis* and *Yersinia pestis* (36-  
347 38), although spermidine inhibits biofilm formation by some bacteria (39, 40). Here, we  
348 demonstrated that exogenous putrescine and cadaverine stimulate *P. gingivalis* biofilm  
349 development while producing different biofilm phenotypes; cadaverine yielded more rigid biofilms  
350 with less suspended cells, whereas putrescine thickened biofilms with more suspended cells. The  
351 distinct biofilm phenotypes may represent differences in biofilm developmental stages and  
352 suggest the potential of putrescine to accelerate the lifecycle of *P. gingivalis* biofilms, enabling  
353 both biofilm formation and dispersal. In fact, previous work showed that putrescine acts as an  
354 extracellular signal for swarming and is necessary for effective migration across agar surfaces in  
355 *Proteus mirabilis* (41). A recent multi-omics study showed that *P. gingivalis* strain 381 can surface  
356 translocate when sandwiched between two surfaces, and this dispersion-like behavior involves

357 intracellular metabolic changes in the arginine and polyamine pathways, with citrulline and  
358 ornithine accumulation along with exhaustion of arginine and putrescine (42). Although the  
359 mechanistic details of the role of polyamines in *P. gingivalis* physiology are largely unknown and  
360 further studies will be necessary to gain a better understanding, putrescine seems to be a key  
361 signal for transforming physiology and accelerating the biofilm lifecycle of *P. gingivalis* to promote  
362 habitat expansion.

363 A number of studies using clinical samples have found the possible involvement of  
364 polyamines and related metabolites in the pathogenesis of periodontitis. A comparative  
365 metagenomics study using whole-genome shotgun sequencing revealed that a disease-  
366 associated microbiota exhibits metabolic functions that are largely absent in health, and those  
367 functions include polyamine uptake systems regulated by a putrescine transport ATP-binding  
368 protein (43). A metabolomic analysis of gingival crevicular fluids revealed significantly elevated  
369 levels of putrescine and cadaverine, as well as various amino acids including ornithine, in the  
370 subgingival crevice of periodontitis sites (44). Our previous metabolomic studies using saliva  
371 samples also showed that a disease-associated microbiota likely produces polyamines, including  
372 putrescine and cadaverine, which is reflected in the distinct salivary metabolomic landscapes of  
373 periodontitis patients (45, 46). Although the extent to which *F. nucleatum* dictates the enrichment  
374 of polyamine metabolism in periodontitis has yet to be determined and other community members  
375 may contribute to polyamine production, the data presented in this work add to the evidence that  
376 the transition from periodontal health to disease is linked to metabolic specialization, including  
377 polyamine metabolism, in subgingival microbial communities.

378 Although this study focused on a few oral bacteria to simulate metabolic cross-feeding during  
379 dental biofilm maturation, we acknowledge that oral biofilm ecosystems have food webs  
380 comprising many layers of complexity that fall outside the scope of our framework (47). In  
381 addition, the nature of metabolic interactions may be affected by the physical proximity of species  
382 and their structural organization, which are important features of biofilms (48). These limitations  
383 notwithstanding, this study provides new insights into how the trophic web in oral biofilm  
384 ecosystems impacts the process of dental biofilm maturation; specifically, ornithine cross-feeding  
385 by *S. gordonii* induces putrescine production by *F. nucleatum*, which can culminate in the  
386 overgrowth and habitat expansion of *P. gingivalis*. Our results reveal a new example of  
387 cooperative metabolism between oral bacteria that is unattainable without the sharing of  
388 metabolic pathways in multiple taxa, and shed light on the metabolic aspects of *F. nucleatum* in  
389 the context of the pathogenicity of microbial communities through metabolic communications  
390 within oral biofilms. Given the significant impact of polyamines on *P. gingivalis* phenotypes, future  
391 work will address the mechanisms by which polyamines affect the physiology of *P. gingivalis* and  
392 explore the possibility that assessing polyamine profiles in subgingival biofilms may yield a novel  
393 method for monitoring disease activity and eventually lead to disease prevention.

394

395

## 396 **Materials and Methods**

397

398 **Bacterial strains and growth conditions.** *F. nucleatum* subsp. *nucleatum* ATCC 25586, *P.*  
399 *gingivalis* ATCC 33277 and *V. parvula* JCM 12972 were grown statically at 37°C in an anaerobic  
400 chamber (Concept Plus; Ruskinn Technology, Bridgend, UK) containing 10% H<sub>2</sub>, 10% CO<sub>2</sub>, and  
401 80% N<sub>2</sub>. Solid and liquid media used for growing each species are described in Supplementary  
402 Information. *S. gordonii* DL1 and its isogenic  $\Delta$ *arcD* mutant (18) were grown statically in Todd-  
403 Hewitt broth (Becton, Dickinson and Company, Franklin Lakes, NJ, USA) under aerobic  
404 conditions (in 5% CO<sub>2</sub> at 37°C), and erythromycin (5 mg/L) was used for selection. At the early-  
405 stationary phase, bacteria were harvested by centrifugation, washed twice with pre-reduced  
406 phosphate-buffered saline (PBS), and then used in the assays. For Transwell assays, bacteria  
407 were anaerobically cultured at 37°C in CDM containing inorganic salts, vitamins and 0.1%  
408 glucose (see Supplementary Materials and Methods for detailed composition).

409

410 **Transwell assay and metabolomic and transcriptional analyses.** Synthetic communities were  
411 created by inoculating  $1.4 \times 10^{10}$  cells of *F. nucleatum* in CDM in the lower chamber of a 6-well  
412 Transwell system with 0.4- $\mu$ m pore polystyrene membrane inserts (Corning, NY, USA), into which  
413  $1.4 \times 10^{10}$  cells of *S. gordonii* or *V. parvula* individually, or their mixture ( $7 \times 10^9$  cells each) in CDM,  
414 or an equal volume of fresh CDM (as a control) were added. Conditions were in triplicate and the  
415 setup was anaerobically incubated at 37°C. Anaerobic conditions were intended not only to  
416 reproduce ornithine cross-feeding (18), but to protect *F. nucleatum* from toxicity of H<sub>2</sub>O<sub>2</sub> produced  
417 by *S. gordonii* in the presence of oxygen (49) which is unlikely to occur in the anaerobic  
418 microenvironment of the gingival margins and subgingival area, and to maximize the cooperative  
419 potential for metabolite exchange between these species. After 6 h, *F. nucleatum* cells were  
420 collected by pipetting from the lower chamber and washed with Milli-Q water by centrifugation.  
421 For metabolomics analysis, bacterial pellets were immediately fixed by adding methanol  
422 containing 5  $\mu$ M internal standard. Spent medium from cultures and sterile CDM were  
423 centrifuged, filtered through 0.22- $\mu$ m PES filtration devices (Merck Millipore, Darmstadt,  
424 Germany) and lyophilized. Capillary electrophoresis time-of-flight mass spectrometry (CE-  
425 TOFMS) was performed as described previously (18). As for metabolites whose levels were  
426 altered significantly in spent media of co-cultures, replicate experiments were performed with the  
427 additional control of mono-cultures of *S. gordonii* or *V. parvula* in CDM ( $1.4 \times 10^{10}$  cells in the lower  
428 chamber of a Transwell plate), and metabolite concentrations in the culture supernatants were  
429 quantified using an Acquity ultra-performance liquid chromatography (UPLC) system with a PDA  
430 Detector (Waters, Milford, MA, USA), as described previously (18), with the exception of butyrate

431 which was quantified using an high-performance liquid chromatography as described previously  
432 (50). Quantification of mRNA transcripts was performed by qRT-PCR as described previously  
433 (18). Primers are listed in Table S1. ATP was measured in a chemiluminescent assay as  
434 described previously (51). For additional details regarding CE-TOFMS, transcriptional analysis  
435 and ATP measurement, see Supplementary Materials and Methods.

436

437 **Polyamine production assay.** Mono-cultures of *F. nucleatum* or *S. gordonii* ( $6.75 \times 10^9$  cells),  
438 and mixed cultures of *F. nucleatum* with *S. gordonii* or *V. parvula* ( $6.75 \times 10^9$  cells each) were  
439 anaerobically incubated at 37°C in pre-reduced CDM containing 10 mM arginine, or lysine.  
440 Culture supernatants were collected by centrifugation and filter sterilized with 0.22- $\mu$ m PES filters  
441 (Merck Millipore). Metabolite concentrations in the culture supernatants were determined using an  
442 Acquity UPLC system with a PDA Detector (Waters), as described previously (18). pH values in  
443 the culture supernatants were determined with an F51 pH meter (Horiba, Kyoto, Japan).

444

445 **MALDI-MSI for putrescine visualization.** MALDI-MSI was performed as described previously  
446 (52). Briefly, Indium-tin-oxide (ITO)-coated glass slides were immersed in *F. nucleatum* mono-  
447 cultures developed in PBS with or without 10 mM ornithine. After 24 h, biofilms formed on the  
448 glass slides were gently washed with PBS and subjected to fixation. After on-tissue derivatization  
449 using 2,4-diphenyl-pyranilium tetrafluoroborate (DPP-TFB, Merck, St. Louis, MO, USA), MALDI-  
450 MSI analyses were performed using iMScope TRIO (Shimadzu, Kyoto, Japan). See  
451 Supplementary Materials and Methods for more detail.

452

453 **Biofilm assay.** To assess the effects of various polyamines on *P. gingivalis* biofilms, we initially  
454 preformed biofilms by incubating  $4 \times 10^7$  cells anaerobically at 37°C for 24 h in pre-reduced  
455 minimal medium (53) in a 25% saliva-coated well of an 8-well Chamber Slide System (Thermo  
456 Fisher Scientific, Waltham, MA, USA) with rotating. The resulting biofilms were incubated  
457 anaerobically in pre-reduced PBS containing each polyamine for 12 h. After staining with a  
458 Live/Dead BacLight kit (Molecular Probes, Eugene, OR, USA), gentle washing with PBS and  
459 extended anaerobic incubation in pre-reduced PBS containing each polyamine for 3 h, biofilm  
460 microstructures and newly released planktonic cells were observed with a Leica SP8 confocal  
461 laser scanning microscope (CLSM; Leica Microsystem, Wetzlar, Germany) and analyzed with  
462 Imaris 7.1.0 software (Bitplane, Belfast, UK), which is fully described in Supplementary Materials  
463 and Methods. For other bacteria, the same procedures were repeated, with the details for  
464 performing the biofilms described in Supplementary Materials and Methods. To assess the effects  
465 of putrescine on biofilms, *S. gordonii* and *P. gingivalis* were stained with 15 mg/l hexidium iodide  
466 (HI; Thermo Fisher Scientific) and 4 mg/l 5-(and-6)-carboxyfluorescein and succinimidyl ester  
467 (FITC; Thermo Fisher Scientific), respectively. Preformed biofilms were treated with pre-reduced

468 PBS containing putrescine for 12 h, followed by CLSM. To observe the responses of *P. gingivalis*  
469 to cell-free supernatants from 24-h cultures of *F. nucleatum* and *S. gordonii*, the culture  
470 supernatants were obtained by the same method as those of the polyamine production assays,  
471 with the pH adjusted to 7. *P. gingivalis* ( $2.8 \times 10^8$  cells) was stained with FITC and incubated  
472 anaerobically for 24 h in pre-reduced PBS containing 50% cell-free supernatants, followed by  
473 CLSM. For analysis of mixed biofilm formation, *F. nucleatum* ( $3.2 \times 10^8$  cells), stained with FITC,  
474 was anaerobically cultured in CDM for 24 h, washed gently by PBS, then co-cultured with  $3.2 \times 10^7$   
475 cells of *P. gingivalis* labelled with DAPI, in the presence of ornithine for 24 h.

476

477 **Sample collection and detection of selected genes.** We employed supragingival plaque  
478 samples, collected in our previous multi-omics study (45, 46), which was conducted from 2013 to  
479 2014, with approval from the Osaka University Research Ethics Committee and in accordance  
480 with the principles of the Helsinki Declaration and STROBE guidelines for human observational  
481 studies. All participants provided written informed consent prior to enrolment. Detailed information  
482 about inclusion and exclusion criteria, oral examinations and sample collection are shown in  
483 Supplementary Materials and Methods. Characteristics of study participants are summarized in  
484 Table S2. Bacterial DNA was extracted using DNeasy PowerSoil Pro Kit (Qiagen, Hilden,  
485 Germany) protocol according to the manufacturer's instructions. Primers and TaqMan probes  
486 (conjugated with FAM, ZEN and IBFQ) were designed based on the specific sequences for *arcD*  
487 of *S. gordonii*, FN0501 of *F. nucleatum*, 16S rRNA gene of *P. gingivalis* using nucleotide BLAST  
488 (NCBI), CLUSTALW (DDBJ) and PrimerQuest (Integrated DNA Technologies, Coralville, IA,  
489 USA). A universal probe/primer set previously described was designed with some modifications  
490 and used for standardization (54, 55). TaqMan real-time PCR was performed on a Roter-Gene Q  
491 System (Qiagen) using a Thunderbird SYBR qPCR Mix (Toyobo, Osaka, Japan). Primers and  
492 probes are listed in Table S3.

493

494 **Statistical analyses.** Statistical analysis for intracellular metabolomics data was based on  
495 multivariate analysis by OPLS-DA using SIMCA-P software (version 14.0; Umetrics, Umeå,  
496 Sweden). Score plots and S-plots were constructed using Pareto scaling, and metabolites that  
497 contributed most to discrimination were chosen based on a  $p$  (corr) value  $>0.6$ . Statistical analysis  
498 for extracellular metabolomics data was based on comparison between groups with Mann-  
499 Whitney's U test using SPSS (version 22; IBM, NY, USA). Extracellular levels of selected  
500 metabolites were compared between co-cultures and each mono-culture with one-way analysis of  
501 variance (ANOVA) followed by Tukey's test using SPSS. The results from qRT-PCR and biofilm  
502 assays were analyzed by one-way ANOVA with post hoc paired comparison conducted with  
503 Dunnett's test using SPSS. ROC curves and logistic regression were performed with R package  
504 (v4.0.3).

505

506

507 **Acknowledgments.** We thank AMED-CREST for support through 18gm0710005h0206 (MK);  
508 MEXT/JSPS KAKENHI for support through 18H04068 (AA), 18H05387 (AA), 19H03862 (MK),  
509 and 18K17281 (AS); and NIH/NIDCR for support through DE012505, DE023193 and DE011111  
510 (R.JL). We are also thankful for excellent technical assistance from Miho Kakiuchi.

511

512

513

## References

- 514 1. M. S. Tonetti, H. Greenwell, K. S. Kornman, Staging and grading of periodontitis:  
515 framework and proposal of a new classification and case definition. *J. Periodontol.* **89**  
516 (suppl. 1), 159–172 (2018).
- 517 2. R. J. Lamont, H. Koo, G. Hajishengallis, The oral microbiota: dynamic communities and  
518 host interactions. *Nat. Rev. Microbiol.* **16**, 745–759 (2018).
- 519 3. R. J. Lamont, G. Hajishengallis, Polymicrobial synergy and dysbiosis in inflammatory  
520 disease. *Trends. Mol. Med.* **21**, 172–183 (2015).
- 521 4. P. Jorth, K *et al.*, Metatranscriptomics of the human oral microbiome during health and  
522 disease. *mBio* **5**, e01012–14 (2014).
- 523 5. K. Zengler, L. S. Zaramela, The social network of microorganisms - how auxotrophies  
524 shape complex communities. *Nat. Rev. Microbiol.* **16**, 383–390 (2018).
- 525 6. S. E. Whitmore, R. J. Lamont, The pathogenic persona of community-associated oral  
526 streptococci. *Mol. Microbiol.* **81**, 305–314 (2011).
- 527 7. J. Kreth, R.A. Giacaman, R. Raghavan, J. Merritt, The road less traveled - defining  
528 molecular commensalism with *Streptococcus sanguinis*. *Mol. Oral Microbiol.* **32**, 181–196  
529 (2017).
- 530 8. J. L. Murray, J. L. Connell, A. Stacy, K. H. Turner, M. Whiteley, Mechanisms of synergy in  
531 polymicrobial infections. *J. Microbiol.* **52**, 188–199 (2014).
- 532 9. M. Kuboniwa *et al.*, Metabolic crosstalk regulates *Porphyromonas gingivalis* colonization  
533 and virulence during oral polymicrobial infection. *Nat. Microbiol.* **2**, 1493–1499 (2017).
- 534 10. G. Aleti *et al.*, Identification of the bacterial biosynthetic gene clusters of the oral  
535 microbiome illustrates the unexplored social language of bacteria during health and  
536 disease. *mBio* **10**, e00321–19 (2019).
- 537 11. W. E. Moore, L. V. Moore. The bacteria of periodontal diseases. *Periodontol.* **2000** **5**, 66–  
538 77 (1994).
- 539 12. L. Abusleme *et al.*, The subgingival microbiome in health and periodontitis and its  
540 relationship with community biomass and inflammation. *ISME J.* **7**, 1016–1025 (2013).
- 541 13. C. A. Brennan, W. S. Garrett, *Fusobacterium nucleatum* - symbiont, opportunist and  
542 oncobacterium. *Nat. Rev. Microbiol.* **17**, 156–166 (2019).
- 543 14. P. E. Kolenbrander, R. J. Palmer, Jr., S. Periasamy, N. S. Jakubovics, Oral multispecies  
544 biofilm development and the key role of cell-cell distance. *Nat. Rev. Microbiol.* **8**, 471–480  
545 (2010).
- 546 15. P. I. Diaz, P. S. Zilm, A. H. Rogers, *Fusobacterium nucleatum* supports the growth of  
547 *Porphyromonas gingivalis* in oxygenated and carbon-dioxide-depleted environments.  
548 *Microbiology* **148**, 467–472 (2002).
- 549 16. A. I. Bolstad, H. B. Jensen, V. Bakken, Taxonomy, biology, and periodontal aspects of  
550 *Fusobacterium nucleatum*. *Clin. Microbiol. Rev.* **9**, 55–71 (1996).
- 551 17. S. Anand, H. Kaur, S. S. Mande, Comparative in silico analysis of butyrate production  
552 pathways in gut commensals and pathogens. *Front. Microbiol.* **7**, 1945 (2016).
- 553 18. A. Sakanaka, M. Kuboniwa, H. Takeuchi, E. Hashino, A. Amano, Arginine-ornithine  
554 antiporter ArcD controls arginine metabolism and interspecies biofilm development of  
555 *Streptococcus gordonii*. *J. Biol. Chem.* **290**, 21185–21198 (2015).

- 556 19. A. E. Sanders, A. Umana, J. A. Lemkul, D. J. Slade, FusoPortal: an interactive repository  
557 of hybrid MinION-sequenced *Fusobacterium* genomes improves gene identification and  
558 characterization. *mSphere* **3**, e00228–18 (2018).
- 559 20. S. M. Todd, R. E. Settlege, K. K. Lahmers, D. J. Slade, *Fusobacterium* genomics using  
560 MinION and illumina sequencing enables genome completion and correction. *mSphere*  
561 **3**, e00269–18 (2018).
- 562 21. K. Kashiwagi, S. Shibuya, H. Tomitori, A. Kuraish, K. Igarashi, Excretion and uptake of  
563 putrescine by the PotE protein in *Escherichia coli*. *J. Biol. Chem.* **272**, 6318–6323 (1997).
- 564 22. W. Nesse *et al.*, Periodontal inflamed surface area: quantifying inflammatory burden. *J*  
565 *Clin Periodontol.* **35**, 668-673 (2008).
- 566 23. A. H. Rogers, N. J. Gully, A. L. Pfennig, P. S. Zilm, The breakdown and utilization of  
567 peptides by strains of *Fusobacterium nucleatum*. *Oral Microbiol. Immunol.* **7**, 299–303  
568 (1992).
- 569 24. D. Grenier, Effect of proteolytic enzymes on the lysis and growth of oral bacteria. *Oral*  
570 *Microbiol. Immunol.* **9**, 224–228 (1994).
- 571 25. Z. L. Deng, H. Sztajer, M. Jarek, S. Bhujji, I. Wagner-Dobler, Worlds apart - transcriptome  
572 profiles of key oral microbes in the periodontal pocket compared to single laboratory  
573 culture reflect synergistic interactions. *Front. Microbiol.* **9**, 124 (2018).
- 574 26. G. D'Souza *et al.*, Ecology and evolution of metabolic cross-feeding interactions in  
575 bacteria. *Nat. Prod. Rep.* **35**, 455–488 (2018).
- 576 27. Machado D *et al.*, Polarization of microbial communities between competitive and  
577 cooperative metabolism. *Nat. Ecol. Evol.* **5**, 195-203 (2021).
- 578 28. A. R. Pacheco, M. Moel, D. Segrè, Costless metabolic secretions as drivers of  
579 interspecies interactions in microbial ecosystems. *Nat. Commun.* **10**, 103 (2019).
- 580 29. F. Barbieri, C. Montanari, F. Gardini, G. Tabanelli, Biogenic amine production by lactic  
581 acid bacteria: a review. *Foods* **8**, 17 (2019).
- 582 30. C. H. Johnson *et al.*, Metabolism links bacterial biofilms and colon carcinogenesis. *Cell*  
583 *Metab.* **21**, 891-897 (2015).
- 584 31. A. J. Michael, Polyamine function in archaea and bacteria. *J. Biol. Chem.* **293**, 18693–  
585 18701 (2018).
- 586 32. F. R. Pinu, N *et al.*, Metabolite secretion in microorganisms: the theory of metabolic  
587 overflow put to the test. *Metabolomics* **14**, 43 (2018).
- 588 33. Y. Tsuge, H. Kawaguchi, K. Sasaki, A. Kondo, Engineering cell factories for producing  
589 building block chemicals for bio-polymer synthesis. *Microb. Cell Fact.* **15**, 19 (2016).
- 590 34. Y. Nakada, Y. Itoh, Identification of the putrescine biosynthetic genes in *Pseudomonas*  
591 *aeruginosa* and characterization of agmatine deiminase and *N*-carbamoylputrescine  
592 amidohydrolase of the arginine decarboxylase pathway. *Microbiology* **149**, 707–714  
593 (2003).
- 594 35. C. C. Hanfrey *et al.*, Alternative spermidine biosynthetic route is critical for growth of  
595 *Campylobacter jejuni* and is the dominant polyamine pathway in human gut microbiota.  
596 *J. Biol. Chem.* **286**, 43301–43312 (2011).
- 597 36. C. N. Patel *et al.*, Polyamines are essential for the formation of plague biofilm. *J Bacteriol.*  
598 **188**, 2355–2363 (2006).
- 599 37. M. Burrell, C. C. Hanfrey, E. J. Murray, N. R. Stanley-Wall, A. J. Michael, Evolution and  
600 multiplicity of arginine decarboxylases in polyamine biosynthesis and essential role in  
601 *Bacillus subtilis* biofilm formation. *J. Biol. Chem.* **285**, 39224–39238 (2010).
- 602 38. L. Hobbey *et al.*, Norspermidine is not a self-produced trigger for biofilm disassembly. *Cell*  
603 **156**, 844–854 (2014).
- 604 39. Y. Wang *et al.*, Spermidine inversely influences surface interactions and planktonic growth  
605 in *Agrobacterium tumefaciens*. *J. Bacteriol.* **198**, 2682–2691 (2016).
- 606 40. K. Kera *et al.*, Reduction of spermidine content resulting from inactivation of two arginine  
607 decarboxylases increases biofilm formation in *Synechocystis* sp. strain PCC 6803. *J.*  
608 *Bacteriol.* **200**, e00664–17 (2018).
- 609 41. G. Sturgill, P. N. Rather, Evidence that putrescine acts as an extracellular signal required  
610 for swarming in *Proteus mirabilis*. *Mol. Microbiol.* **51**, 437–446 (2004).



- 611 42. M. F. Moradali, S. Ghods, T. E. Angelini, M. E. Davey, Amino acids as wetting agents:  
612 surface translocation by *Porphyromonas gingivalis*. *ISME J.* **13**, 1560–1574 (2019).
- 613 43. S. M. Dabdoub, S. M. Ganesan, P. S. Kumar, Comparative metagenomics reveals  
614 taxonomically idiosyncratic yet functionally congruent communities in periodontitis. *Sci.*  
615 *Rep.* **6**, 38993 (2016).
- 616 44. V. M. Barnes *et al.*, Acceleration of purine degradation by periodontal diseases. *J. Dent.*  
617 *Res.* **88**, 851–855 (2009).
- 618 45. M. Kuboniwa *et al.*, Prediction of periodontal inflammation via metabolic profiling of saliva.  
619 *J. Dent. Res.* **95**, 1381–1386 (2016).
- 620 46. A. Sakanaka *et al.*, Distinct signatures of dental plaque metabolic byproducts dictated by  
621 periodontal inflammatory status. *Sci. Rep.* **7**, 42818 (2017).
- 622 47. D. P. Miller, Z. R. Fitzsimonds, R. J. Lamont, Metabolic signaling and spatial interactions  
623 in the oral polymicrobial community. *J. Dent. Res.* **98**, 1308–1314 (2019).
- 624 48. W. H. Bowen, R. A. Burne, H. Wu, H. Koo, Oral Biofilms: pathogens, matrix, and  
625 polymicrobial interactions in microenvironments. *Trends Microbiol.* **26**, 229–242 (2018).
- 626 49. J. Abranches *et al.*, Biology of oral streptococci. *Microbiol. Spectr.* **6**,  
627 doi:10.1128/microbiolspec.GPP3-0042-2018.
- 628 50. T. Asama *et al.*, Effects of heat-killed *Lactobacillus kunkeei* YB38 on human intestinal  
629 environment and bowel movement: a pilot study. *Benef. Microbes* **7**, 337–344 (2016).
- 630 51. N. R. Glasser, S. E. Kern, D. K. Newman, Phenazine redox cycling enhances anaerobic  
631 survival in *Pseudomonas aeruginosa* by facilitating generation of ATP and a proton-motive  
632 force. *Mol. Microbiol.* **92**, 399–412 (2014).
- 633 52. Y. Enomoto, P. Nt An, M. Yamaguchi, E. Fukusaki, S. Shimma, Mass spectrometric  
634 imaging of GABA in the *Drosophila melanogaster* adult head. *Anal. Sci.* **34**, 1055–1059  
635 (2018).
- 636 53. P. Milner, J. E. Batten, M. A. Curtis, Development of a simple chemically defined medium  
637 for *Porphyromonas gingivalis*: requirement for alpha-ketoglutarate. *FEMS Microbiol. Lett.*  
638 **140**, 125–130 (1996).
- 639 54. M. A. Nadkarni, F. E. Martin, N. A. Jacques, N. Hunter, Determination of bacterial load by  
640 real-time PCR using a broad-range (universal) probe and primers set. *Microbiology.* **148**,  
641 257-266 (2002).
- 642 55. M. Kuboniwa *et al.*, Quantitative detection of periodontal pathogens using real-time  
643 polymerase chain reaction with TaqMan probes. *Oral Microbiol Immunol.* **19**, 168-176  
644 (2004).
- 645

646 **Figures and Tables**

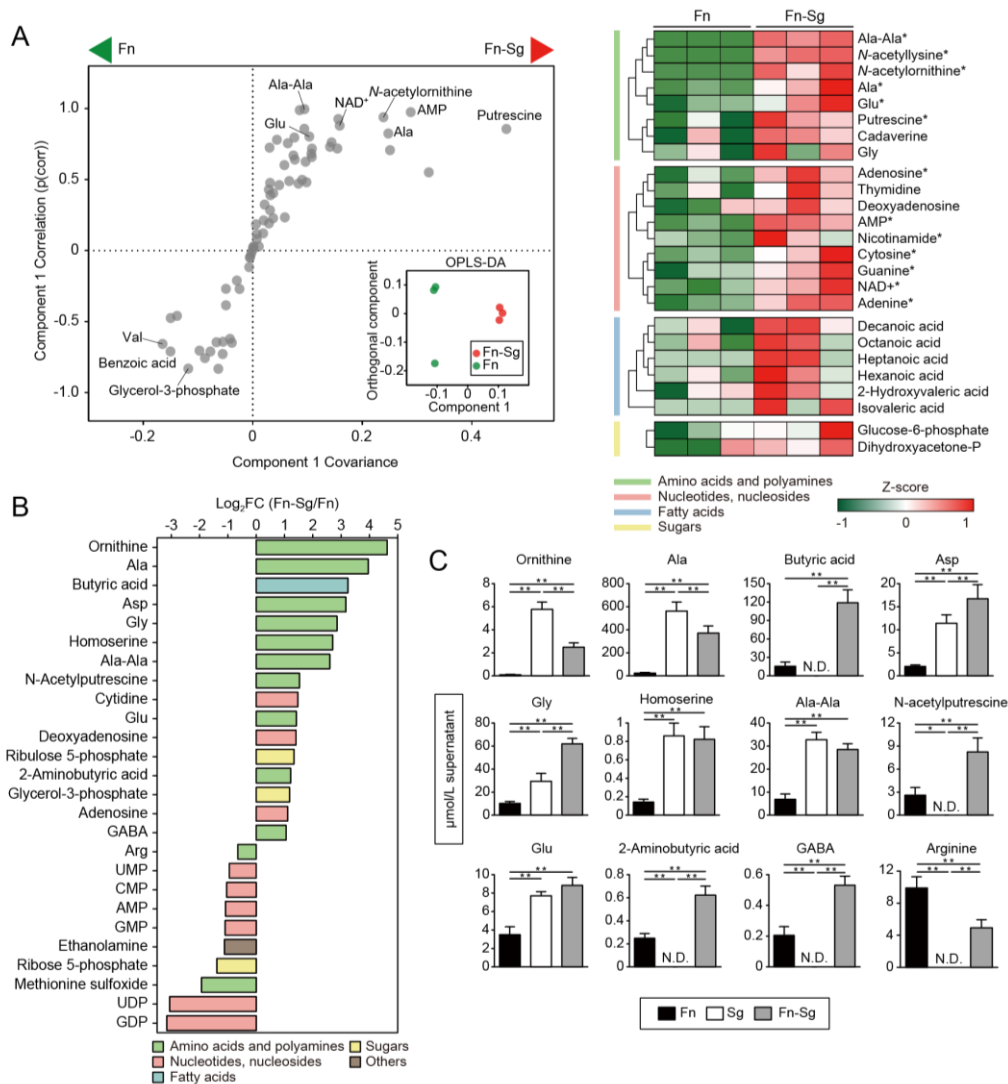

647 **Figure 1.** Intra- and extracellular metabolite changes of *F. nucleatum* co-cultured with *S. gordonii*.  
 648 (A) Intracellular metabolite changes in *F. nucleatum* co-cultured with *S. gordonii*.  $1.4 \times 10^{10}$  cells of  
 649 *F. nucleatum* were anaerobically cultured in CDM in the lower chamber of Transwell plates with  
 650 membrane inserts, into which  $1.4 \times 10^{10}$  cells of *S. gordonii* in CDM or an equal volume of fresh  
 651 CDM (as a control) were added. After 6 h, *F. nucleatum* cells were harvested and metabolic  
 652 profiles were analyzed by CE-TOFMS. OPLS-DA S-plot and score plot (inset) are shown in the  
 653 left panel, where metabolites towards the both sides of S-shape distribution show high model  
 654 influence with high reliability; putrescine was among the most impacted metabolites in co-  
 655 cultures. The right panel shows a clustered heatmap of intracellular metabolites with high  
 656 reliability in the S-plot ( $p(\text{corr}) > 0.6$ ). Metabolite levels are displayed as Z scores, and asterisks  
 657 denote significant differences in univariate methods. \* $p < 0.05$  (Mann-Whitney's U test). (B)  
 658 Extracellular metabolites displaying a concentration change in co-cultures as compared to mono-  
 659 cultures ( $\log_2\text{FC} < -0.6$ ,  $\log_2\text{FC} > 1$  and  $p < 0.05$ ; Mann-Whitney's U test). (C) Levels of the  
 660 selected metabolites in spent media of co-cultures and each mono-culture, determined by UPLC.  
 661 For this, the same procedures were repeated with the additional control of *S. gordonii* mono-  
 662 cultures. Error bars correspond to standard deviations. \* $p < 0.05$  and \*\* $p < 0.01$  (one-way ANOVA  
 663 with Tukey's test).  
 664  
 665

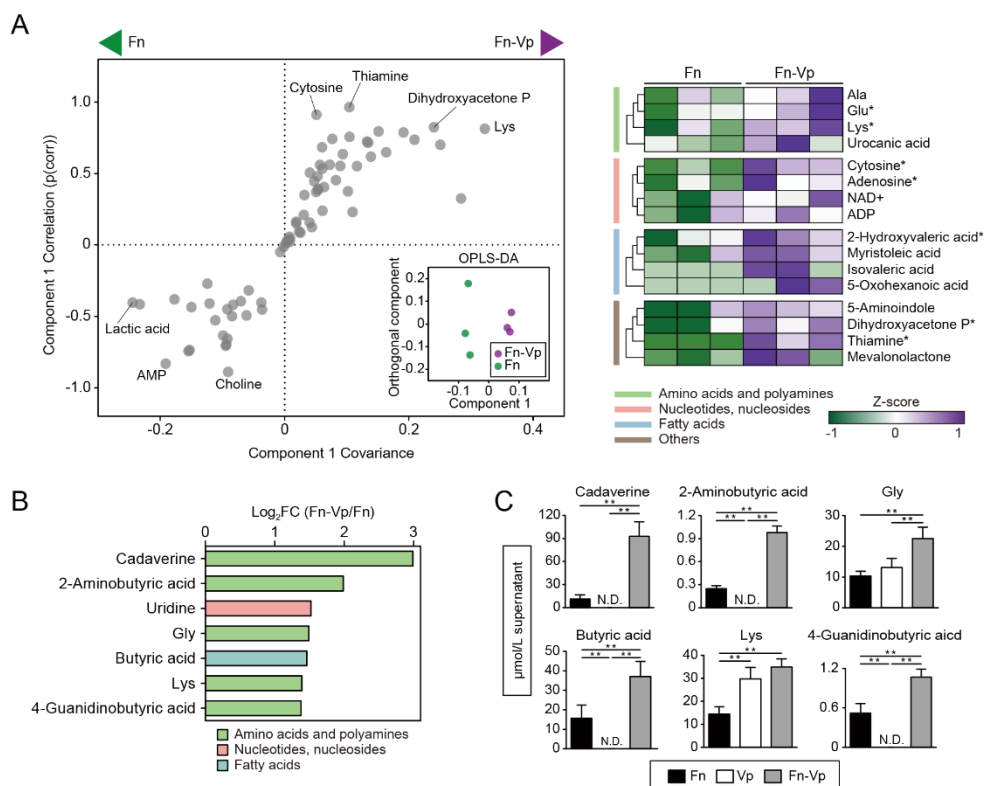

666  
 667 **Figure 2.** Intra- and extracellular metabolite changes of *F. nucleatum* co-cultured with *V. parvula*.  
 668 (A) Intracellular metabolite changes in *F. nucleatum* co-cultured with *V. parvula*. OPLS-DA score  
 669 plot (inset) and S-plot (left panel) show that lysine and thiamine were among the most impacted  
 670 metabolites in co-cultures. The right panel shows a clustered heatmap of intracellular metabolites  
 671 with high reliability in the S-plot ( $p(\text{corr}) > 0.6$ ).  $*p < 0.05$  (Mann-Whitney's U test). (B) Extracellular  
 672 metabolites displaying a concentration change in co-cultures as compared to mono-cultures  
 673 ( $\log_2\text{FC} < -0.6$ ,  $\log_2\text{FC} > 1$  and  $p < 0.05$ ; Mann-Whitney's U test). (C) Levels of the selected  
 674 metabolites in spent media of co-cultures and each mono-culture, determined by UPLC. Error  
 675 bars correspond to standard deviations.  $*p < 0.05$  and  $**p < 0.01$  (one-way ANOVA with Tukey's  
 676 test).  
 677

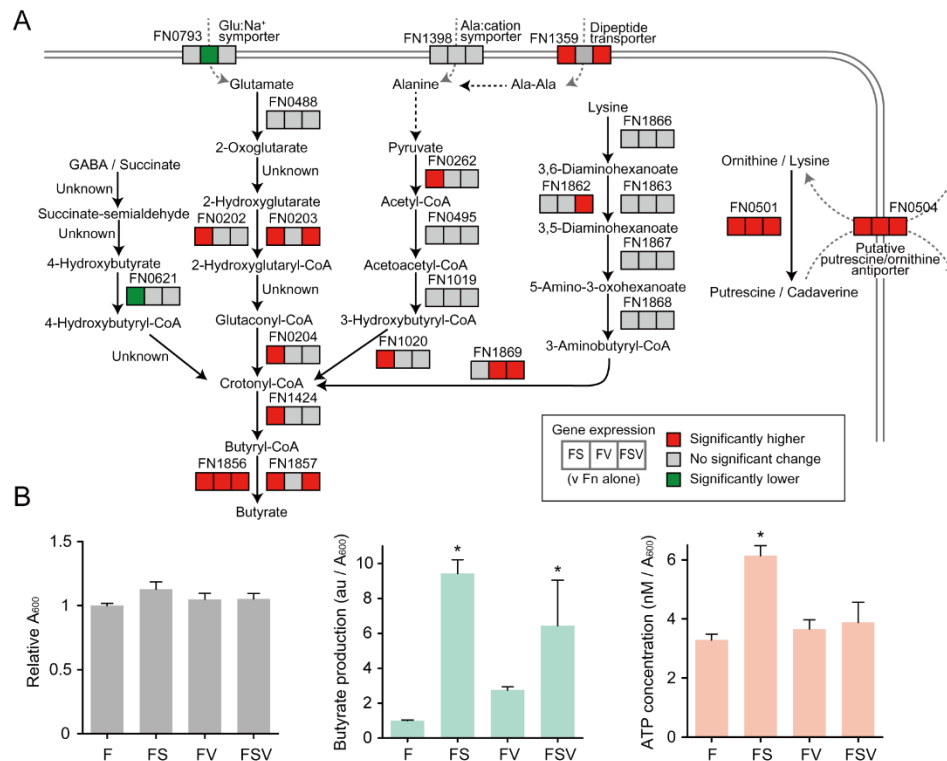

678  
 679 **Figure 3.** Upregulation of butyrate fermentation and polyamine production by *F. nucleatum* in co-  
 680 culture. (A) Transcriptional changes of selected genes involved in the production of butyrate and  
 681 polyamines by *F. nucleatum* when co-cultured with *S. gordonii* or *V. parvula* individually or in  
 682 combination. Transcripts were extracted from *F. nucleatum* cells following the same culture  
 683 conditions as those used for metabolomic assays. 16S rRNA was used for normalization.  
 684 Statistical differences were analyzed using a one-way ANOVA with post hoc paired comparisons  
 685 conducted with Dunnett's test ( $p < 0.05$ ). Red denotes significantly increased levels ( $>1.5$ -fold  
 686 change), green decreased levels ( $<0.65$ -fold change) and gray no significant changes. (B)  
 687 Relative production of butyrate and ATP by *F. nucleatum* in each condition. The left panel shows  
 688 relative absorbance changes in *F. nucleatum* biomass after 6 h of incubation in each condition. In  
 689 this assay, biofilm cells were also retrieved to comprise a total biomass. Bars are representative  
 690 of three independent experiments and presented as the mean with SD of three biological  
 691 replicates. The center panel shows the  $A_{600}$ -adjusted abundance (mean  $\pm$  SD) of butyrate in  
 692 culture supernatants from the metabolomics dataset. The right panel shows the  $A_{600}$ -adjusted  
 693 ATP concentration in *F. nucleatum* cells after 6 h of incubation. F: *F. nucleatum* alone; FS: *F.*  
 694 *nucleatum* and *S. gordonii*; FV: *F. nucleatum* and *V. parvula*; FSV: *F. nucleatum* with *S. gordonii*  
 695 and *V. parvula*. Bars show the mean with SD of a representative experiment of five biological  
 696 replicates. \*,  $p < 0.05$  (versus *F. nucleatum* alone, calculated using ANOVA with Dunnett's test).  
 697

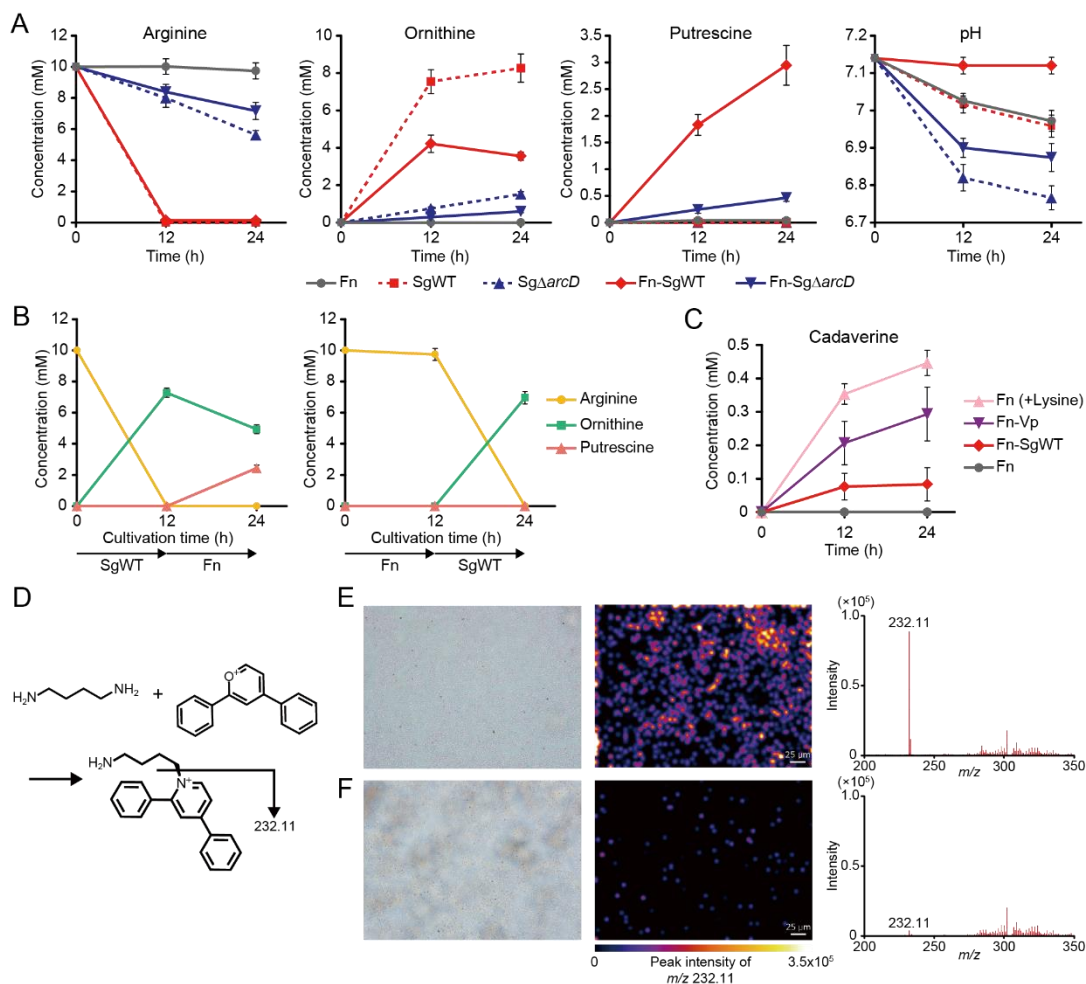

698  
 699 **Figure 4.** Commensal-triggered polyamine production by *F. nucleatum*. (A) Extracellular  
 700 concentrations of arginine, ornithine and putrescine in CDM containing 10 mM arginine incubated  
 701 anaerobically for 12 and 24 h were determined by UPLC after bacterial cells were removed.  
 702 Extracellular pH changes were also shown. (B) Shifts in the extracellular concentrations of  
 703 arginine, ornithine and putrescine in CDM containing 10 mM arginine incubated initially with *S.*  
 704 *gordonii* or *F. nucleatum* for 12 h then with its counterpart for additional 12 h. (C) Changes in  
 705 cadaverine concentrations were determined in supernatants of the designated cultures. Data are  
 706 shown as the means with SDs of a representative experiment of three biological replicates. (D)  
 707 Schematic of putrescine imaging. Using 2,4-diphenyl-pyranilium tetrafluoroborate (DPP-TFB),  
 708 on-tissue derivatization was performed, and the distribution of putrescine (target  $m/z$  232.11) was  
 709 visualized through matrix-assisted laser desorption/ionization mass spectrometry imaging  
 710 (MALDI-MSI). Shown are optical images and imaging results of biofilms formed on indium-tin-  
 711 oxide (ITO)-coated glass slides by immersion for 24 h in *F. nucleatum* mono-cultures developed  
 712 in PBS (E) with or (F) without 10 mM ornithine. Color brightness corresponds to concentration of  
 713 putrescine.  
 714

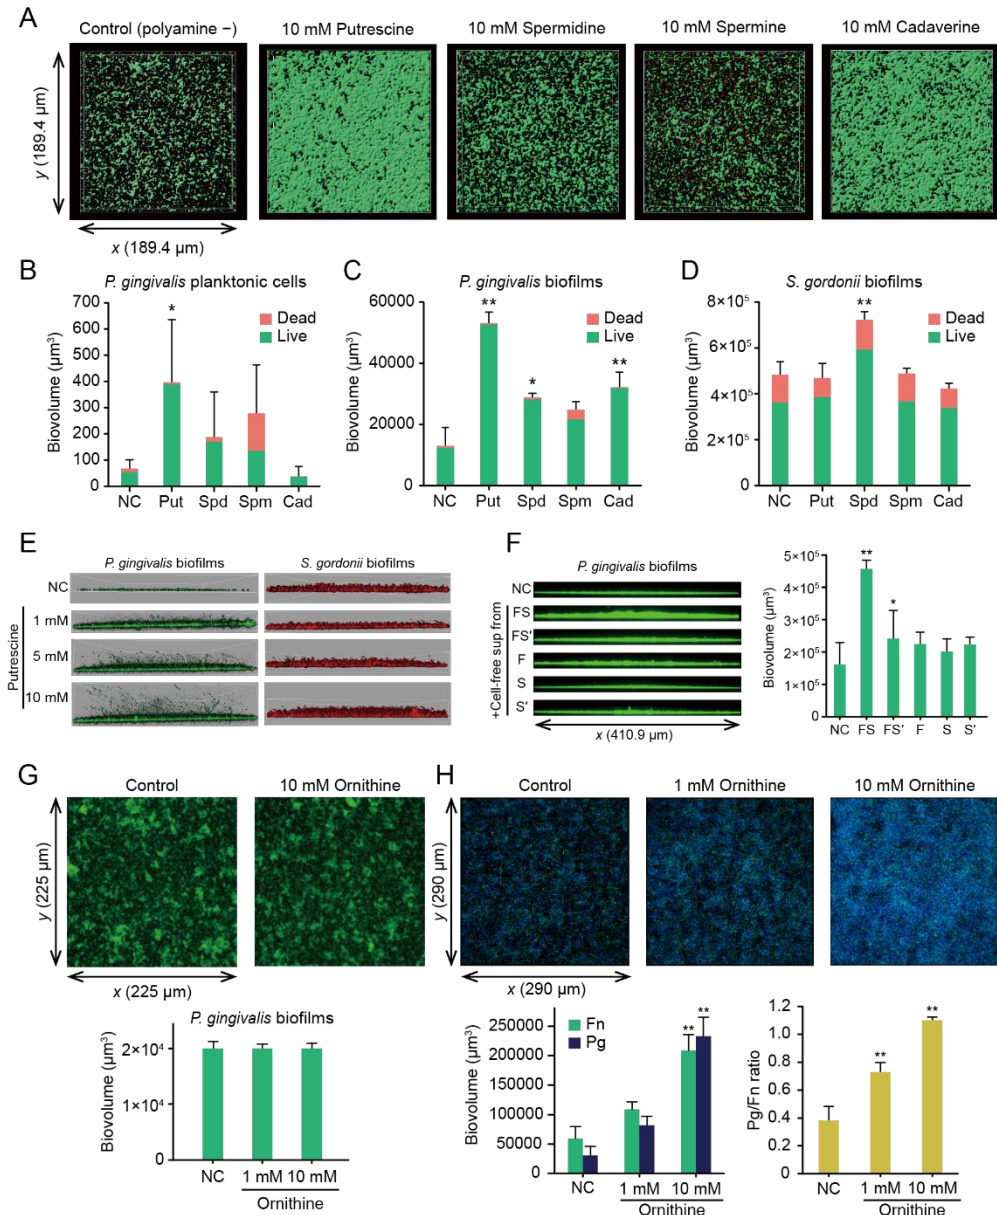

715  
 716 **Figure 5.** Effects of exogenous polyamines on biofilm growth and dispersal of *P. gingivalis*. (A)  
 717 Preformed *P. gingivalis* biofilms were treated anaerobically with PBS containing each polyamine  
 718 for 12 h and then stained with Live/Dead dyes. A series of optical fluorescence x-y sections were  
 719 collected by confocal microscopy. Images are representative of three independent experiments.  
 720 Biovolumes of dispersed planktonic cells (B) and biofilm cells (C) were measured with the Imaris  
 721 Isosurface function after reconstructing three-dimensional images by applying an isosurface over  
 722 Live/Dead-stained biomass separately per color (green/red). (D) The effects of each polyamine  
 723 on *S. gordonii* biofilms were examined as a control, following the same method. Data are  
 724 representative of three independent experiments and presented as the mean with SD of eight  
 725 random fields from one experiment. \* $p < 0.05$ , \*\* $p < 0.01$  compared with the control using ANOVA  
 726 with Dunnett's test. (E) Representative images of putrescine-treated biofilm microstructures of *P.*  
 727 *gingivalis* and *S. gordonii*, which were stained with FITC and HI, respectively, at the start of the  
 728 experiment. (F) *P. gingivalis* biofilms were formed in PBS containing 50% cell-free pH-adjusted  
 729 supernatants of each culture incubated anaerobically for 24 h. FS denotes cell-free supernatants  
 730 of mixed cultures of *F. nucleatum* and WT *S. gordonii*. FS' denotes those of *F. nucleatum* and *S.*

731 *gordonii*  $\Delta arcD$ , while F, S and S' denotes those of mono-cultures of *F. nucleatum*, WT and *S.*  
732 *gordonii*  $\Delta arcD$ , respectively. \* $p < 0.05$ , compared with the control using ANOVA with Dunnett's  
733 test. (G) Effect of ornithine on *P. gingivalis* biofilms. FITC-stained *P. gingivalis* biofilms were  
734 formed in the presence of ornithine after 24 h of incubation. Representative images of biofilm  
735 architecture and biovolume of *P. gingivalis* are shown. (H) Effect of ornithine on *P. gingivalis*  
736 accumulation in *F. nucleatum* biofilms. FITC-stained *F. nucleatum* biofilms (green) were formed  
737 after 24 h of incubation, then gently washed with PBS and co-cultured for 24 h with DAPI-labelled  
738 *P. gingivalis* (blue) in the presence of ornithine. Representative images, biovolumes of each  
739 species and their ratios are shown. \*\* $p < 0.01$  compared with the control using ANOVA with  
740 Dunnett's test.

741

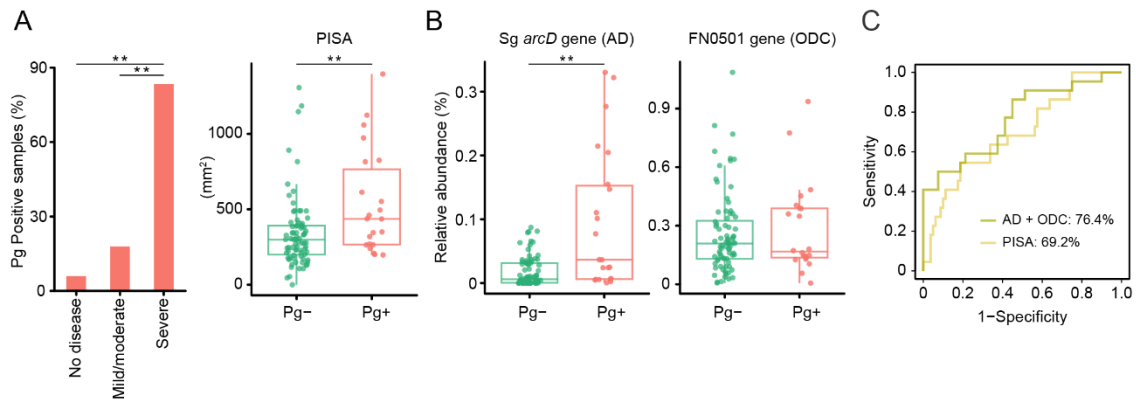

742

743 **Fig. 6.** Cooccurrence of *P. gingivalis* with genetic modules for putrescine production by *S.*  
744 *gordonii* and *F. nucleatum* in 102 plaque samples. (A) Detection of *P. gingivalis* in supragingival  
745 biofilms in states of periodontal health, mild/moderate periodontitis and severe periodontitis (left).  
746 Difference in periodontal inflamed surface area (PISA), a numerical representation of periodontitis  
747 severity, between *P. gingivalis* positive and negative samples (right). \*\* $p < 0.01$  compared with “no  
748 disease” using chi-square test (left). \*\* $p < 0.01$  Mann-Whitney’s U test (right). (B) Difference in  
749 abundances of *S. gordonii arcD* gene and *F. nucleatum FN0501* gene between *P. gingivalis*  
750 positive and negative samples. \*\* $p < 0.01$  Mann-Whitney’s U test. (C) ROC curves comparing the  
751 discriminative performance for *P. gingivalis* detection using logistic regression with *arcD* and  
752 *FN0501* genes (olive), and PISA (yellow).

753



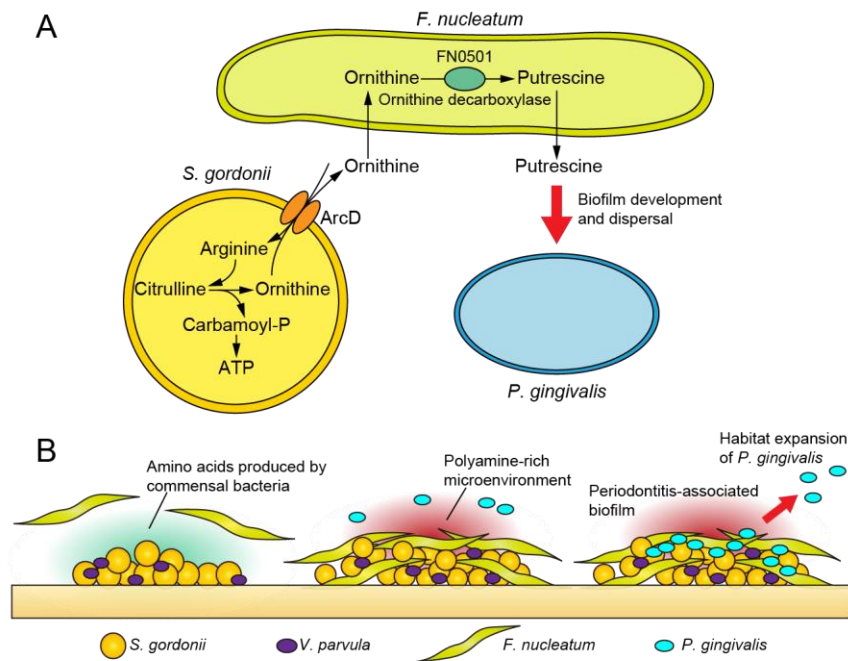

754

755 **Fig. 7.** Proposed schematic model of polymicrobial metabolic synergy in the disease etiology. (A)  
756 Pathogenic cross-feedings among three key species. Arginine deiminase system in *S. gordonii*  
757 facilitates putrescine production by *F. nucleatum*, which could further promote the biofilm  
758 overgrowth and dispersal of *P. gingivalis*. (B) Model depicting metabolic integration by *F.*  
759 *nucleatum* within polymicrobial communities. Commensal-triggered polyamine production by *F.*  
760 *nucleatum* contributes to shaping the periodontitis-associated community.

761
